# Supplementary material for: The splicing factor SRSF3 is functionally connected to the nuclear RNA exosome for intronless mRNA decay
Source: PubMed Central journal article supplement (PMC6110769; doi:10.1038/s41598-018-31078-1), 2018-08-27
Supplement: 41598_2018_31078_MOESM1_ESM.pdf [file 41598_2018_31078_MOESM1_ESM.pdf]

**The splicing factor SRSF3 is functionally connected to the nuclear RNA  
exosome for intronless mRNA decay**

Fabrice Mure<sup>1,2,3,4,5</sup>, Antoine Corbin<sup>1,2,3,4,5</sup>, Nour El Houda Benbahouche<sup>6</sup>, Edouard Bertrand<sup>6</sup>, Evelyne Manet<sup>1,2,3,4,5</sup> and Henri Gruffat<sup>1,2,3,4,5</sup> #.

**Supplementary Information**

**Supplementary Table S1. siRNAs**

| <b>RNAi target</b> | <b>sense strand</b>      | <b>anti-sense strand</b> |
|--------------------|--------------------------|--------------------------|
| Firefly (control)  | GCGGAAUACUUCGAAAUGUdTdT  | ACAUUUCGAAGUAUUCGGCdTdT  |
| SRSF1              | CCAAGGACAUUGAGGACGUdTdT  | ACGUCCUCAUUGUCCUUGGdTdT  |
| SRSF3              | GGAAAUAGAAGACAGUUUGdTdT  | CAAACUGUCUUGUAUUUCCdTdT  |
| SRSF3#2            | GAGUGGAACUGUCGAAUGGdTdT  | CCAUUCGACAGUUCCACUCdTdT  |
| SRSF3#3            | CGAAGUGUGUGGGUUGCUAdTdT  | UAGCAACCCACACACUUCGdTdT  |
| SRSF7              | AGGAGAGUUAGAAAGGGCUdTdT  | AGCCCUUUCUAACUCUCCUdTdT  |
| XRN2               | GAGUACAGAUGAUGAUUdTdT    | AACAUGAUCUUGUACUCdTdT    |
| DCP2               | GGACUGGCUUUCUCGAAGAdTdT  | UCUUCGAGAAAGCCAGUCCdTdT  |
| hRRP40 (EXOSC3)    | CACGCACAGUACUAGGUCAdTdT  | UGACCUAGUACUGUGCGUGdTdT  |
| hRRP46 (EXOSC5)    | CAACAAGGCCACACUCGAAAdTdT | UUCGAGUGUGGCCUUGUUGdTdT  |
| hRRP6 (EXOSC10)    | CCAGUUUACAGACCUAUAdTdT   | UAUAGGUCUGUAUAACUGGdTdT  |
| hDIS3/hRRP44       | AGGUAGAGUUGUAGGAAUAdTdT  | UAUUCUACAACUCUACCUdTdT   |
| hMTR4 (SKIV2L2)    | CAUUUAGGCUCUGAGUAAAdTdT  | UUACUCAGAGCCUUAUUGdTdT   |
| ZCCHC8             | GGAAUGUACCUCAGGAUAAAdTdT | UUAUCCUGAGGUACAUUCdCdTdT |
| RBM7               | GGAUAAAGGCAUUGCUUAAAdTdT | UUAAGCAAUGCCUUAUUCdCdTdT |

**Supplementary Table S2. PCR and qPCR primers**

| <b>Target</b>   | <b>Forward</b>            | <b>Reverse</b>          |
|-----------------|---------------------------|-------------------------|
| U6 snRNA        | CGCTTCGGCAGCACATATAC      | AAAATATGGAACGCTTCACGA   |
| $\beta$ -actin  | GCTGCGTGTGGCTCCCGAGGAG    | ATCTTCATTGTGCTGGGTGCCAG |
| BMRF1           | CCAGACATACGGTCAGTCCATCTC  | TGCTTCACTTTCTTGGGGTGC   |
| BDLF1           | CAGATTTGAAAGTGGTAGTGTC    | TTATCTTAACCAGCAAGTGGCCG |
| BdRF1           | CACTATCAGGTAACGCAGGAG     | TCAAGCCAGCGTTTATTCAGC   |
| BFRF3           | GGGAGGCTCAAAGAAGTTACCTG   | ATGAAGAAACAGAGGGGGTTCGC |
| hMTR4 (P1 + P2) | GGAGATGAGCTGTTCAGCGT      | TTTCCGCCCTTTCTGGTCTC    |
| hMTR4 (P3 + P4) | GCAGGTGATTTGGCCAAAGG      | TCTCTTTGCTACAGCGCAGA    |
| hMTR4 (P5 + P6) | GCCTAACTCTGGTGAAGTGA      | TACAAGTAGAGGCTGGCAGC    |
| SRSF3           | ATGCATCGTGATTCCTGTCC      | CATTTGACCTAGATCGACTACG  |
| GAPDH_qPCR      | AGCCACATCGCTCAGACAC       | GCCCAATACGACCAAATCC     |
| Renilla_qPCR    | TGGAGAATAACTTCTTCGTGAAAAC | GCTGCAAATTCTTCTGGTTCTAA |
| BMRF1_qPCR      | AGGAGTGCTGCAGGTAACCC      | GCTCTGGTGATTCTGCCACT    |
| BDLF1_qPCR      | CGCAGACATGCTCGATGTA       | GTAGTGGTGCCCCAGGTATG    |
| BdRF1_qPCR      | CGGAGTGGCTCAGTCTAAGG      | AGGTGGGCTGACACAGACTT    |
| BFRF3_qPCR      | GGCGGATTTTCCAGACAGT       | TGGGGAGATTATTCTGGTTCA   |
| hMTR4_qPCR      | TTGAAGGGTGTACACATGAGGT    | TCCAACCTCGTGGTTTAAGTGG  |
| proEXT1_qPCR    | TCTAATGGCTGCAGGGAAAC      | TAGCTGGGACAGTTGGCAAT    |

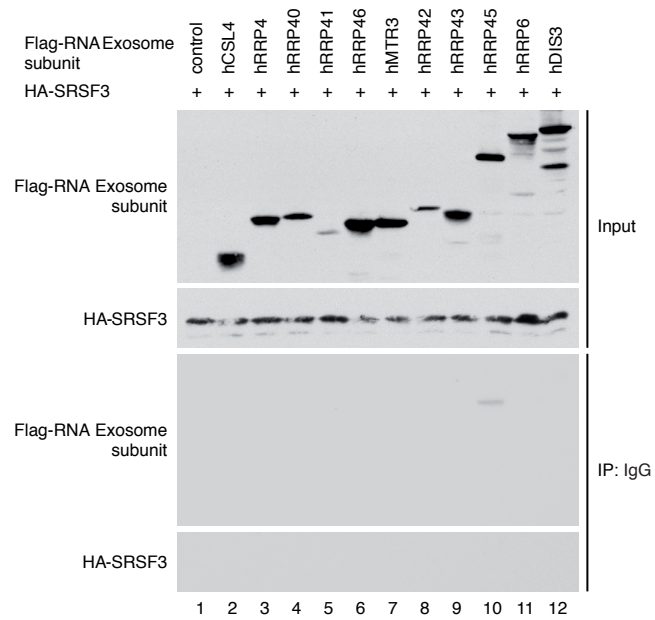

**Supplementary Figure S1 (related to Figure 6)**

**SRSF3 does not interact with Protein G Sepharose beads.** HA-SRSF3 was co-expressed with individual Flag epitope-tagged RNA exosome subunits in HeLa cells as indicated. The top panels show western blotting of 1/10 of total extract ('Input'), and the bottom panels show western blotting following immunoprecipitation with a control antibody (IP: IgG).

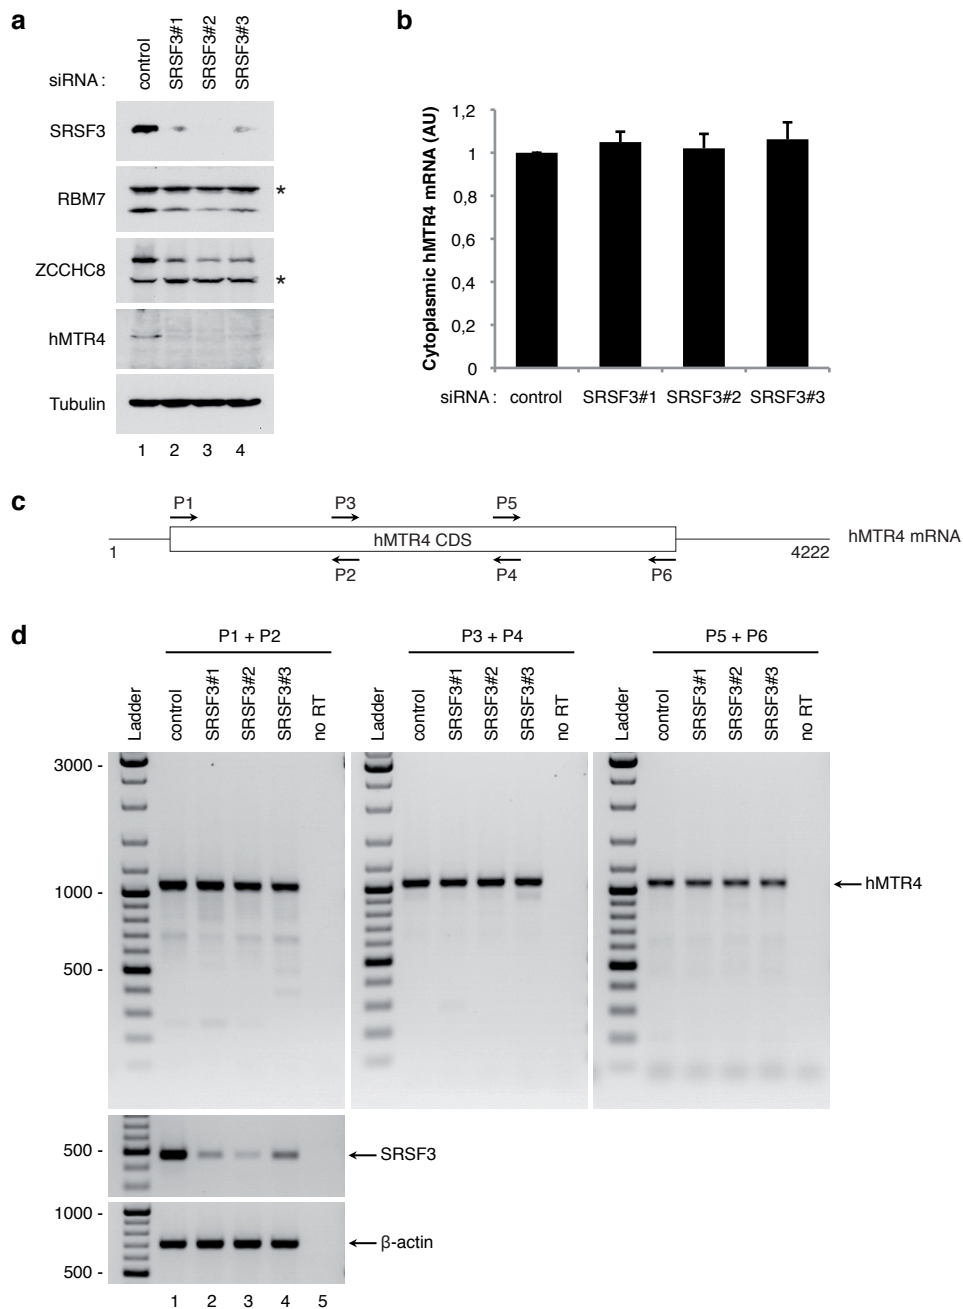

### Supplementary Figure S2 (related to Figure 7)

**Depletion of the splicing factor SRSF3 impacts the hMTR4 protein stability.** (a) Western blotting analysis showing protein depletion upon treatments of HeLa cells with three different siRNAs directed against SRSF3. Anti-Tubulin antibody was used as a loading control. \* indicates non-specific bands. (b) Quantification by RT-qPCR of the cytoplasmic hMTR4 mRNA from HeLa cells transfected with the indicated siRNAs. (c) Schematic representation of the hMTR4 mRNA. Black arrows represent the position of the primers used in the RT-PCR analysis. (d) RT-PCR analysis with three different sets of primers covering the full hMTR4 mRNA from HeLa cells transfected with the indicated siRNAs. The PCR products were loaded on a 1.5% agarose gel and visualized by ethidium bromide staining. The RT-PCR results were in the linear range of the PCR reaction.

**Source data for Fig. 1a**

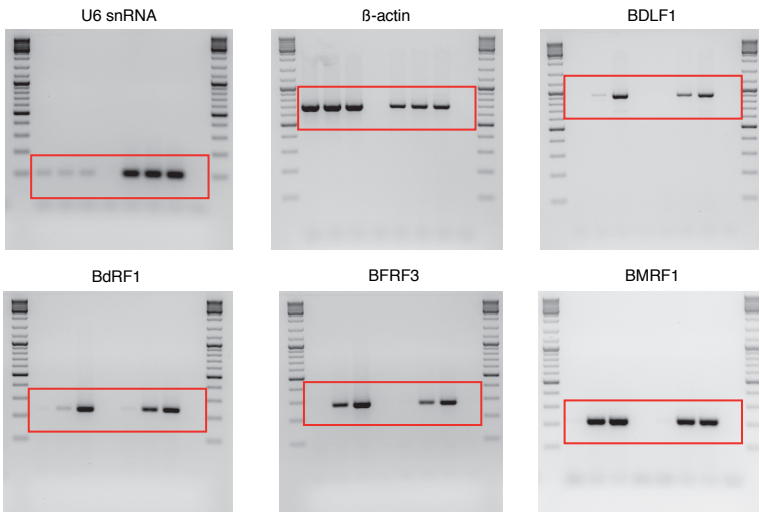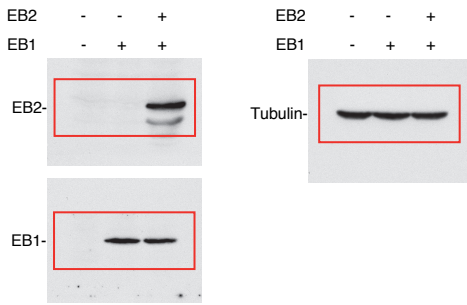

**Source data for Fig. 3a**

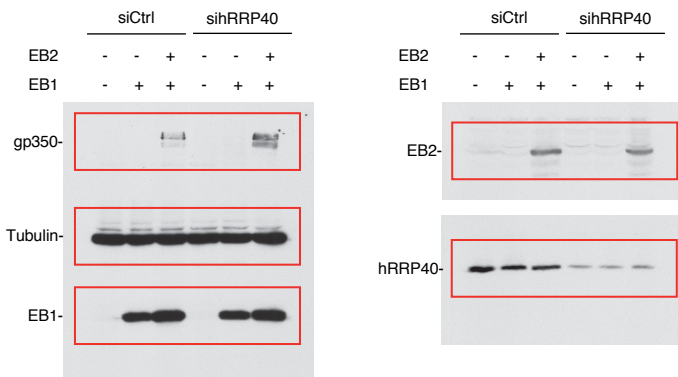

**Source data for Fig. 2a**

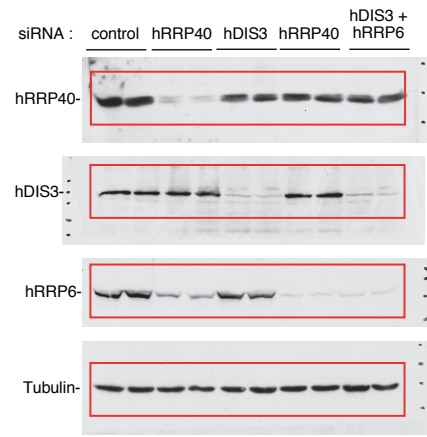

**Source data for Fig. 2c**

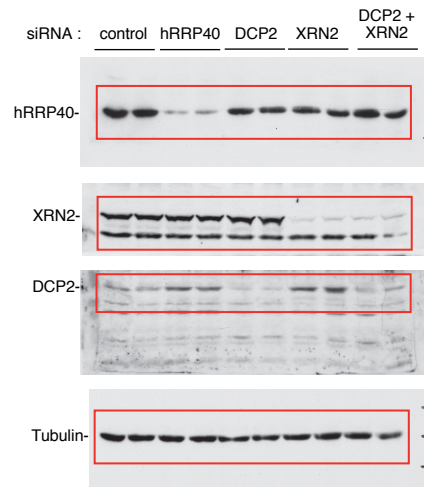

**Source data for Fig. 4a**

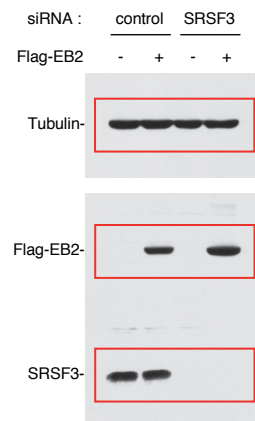

**Source data for Fig. 4e**

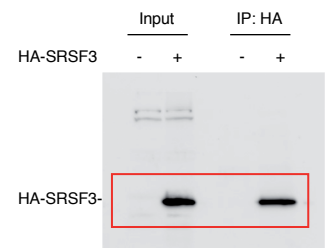

**Supplementary Figure S3. Uncropped gels and blots.**

Source data for Fig. 5a

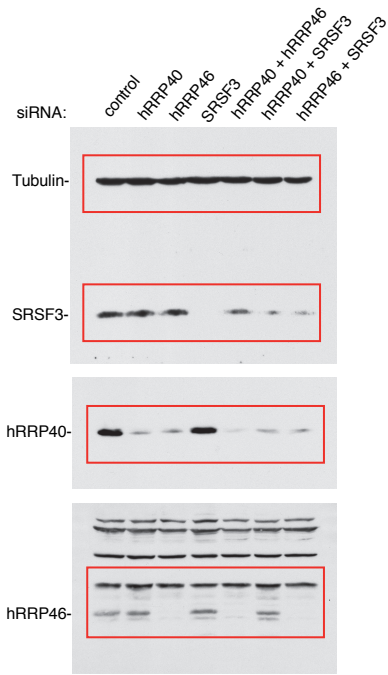

Source data for Fig. 6a

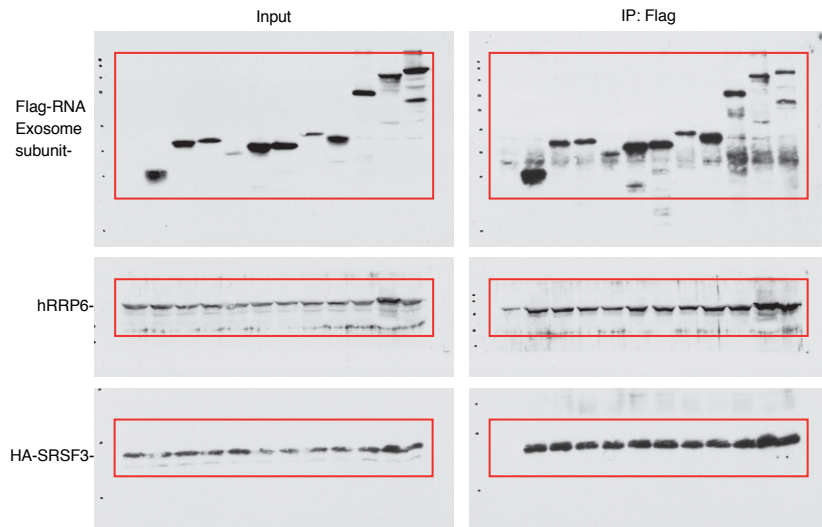

Source data for Fig. 6b

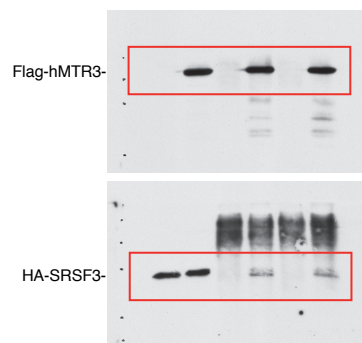

Source data for Fig. 6c

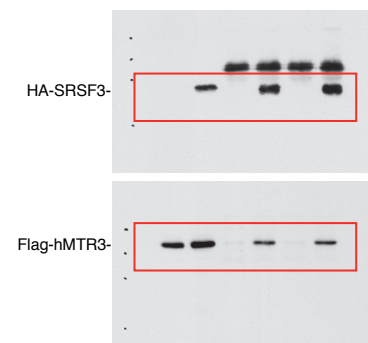

Source data for Fig. 6d

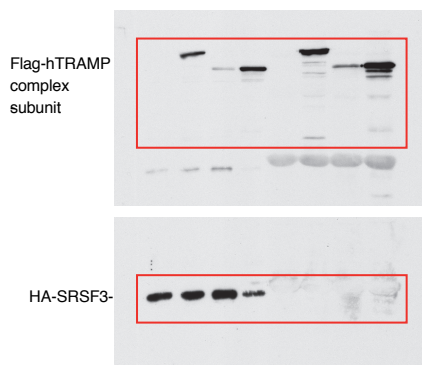

Source data for Fig. 6e

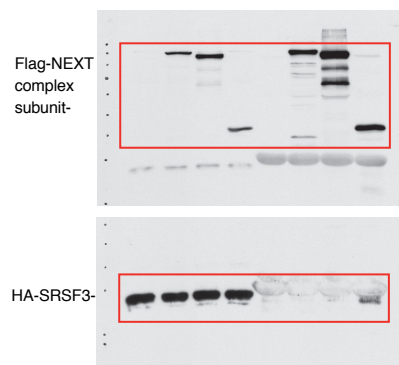

Source data for Fig. 6h

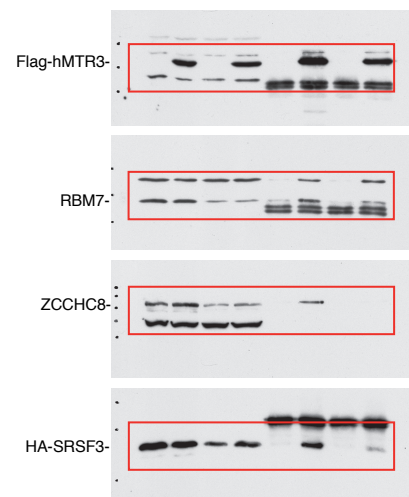

Source data for Fig. 6f

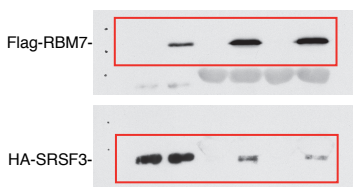

Source data for Fig. 6g

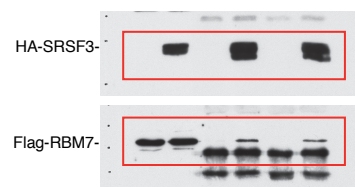

Source data for Fig. 7a

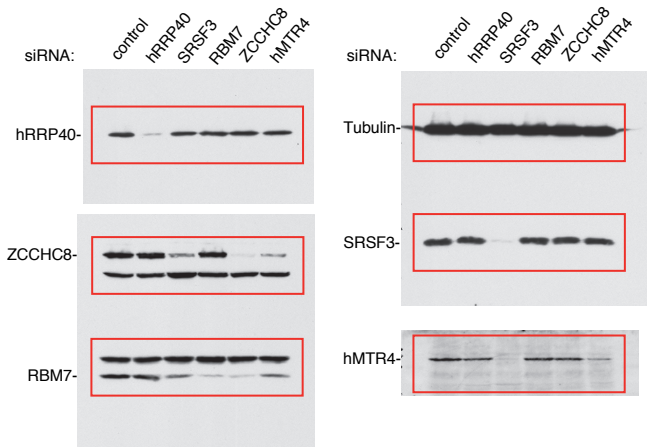

Source data for Fig. 7c

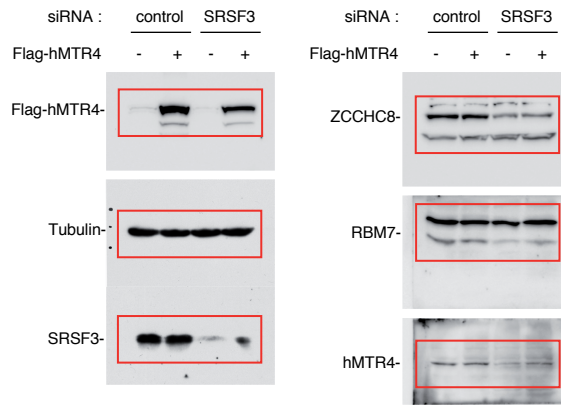

Source data for Fig. 7e

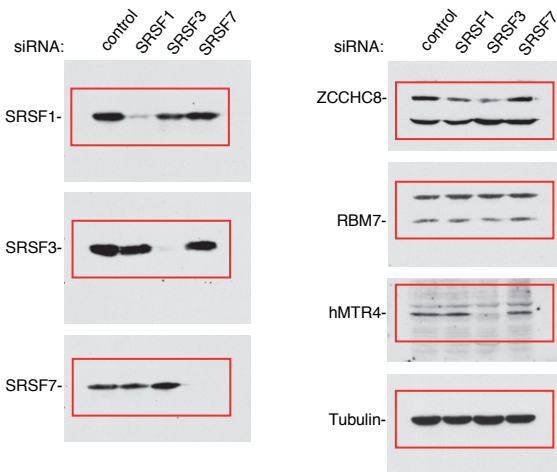

Source data for Fig. S1

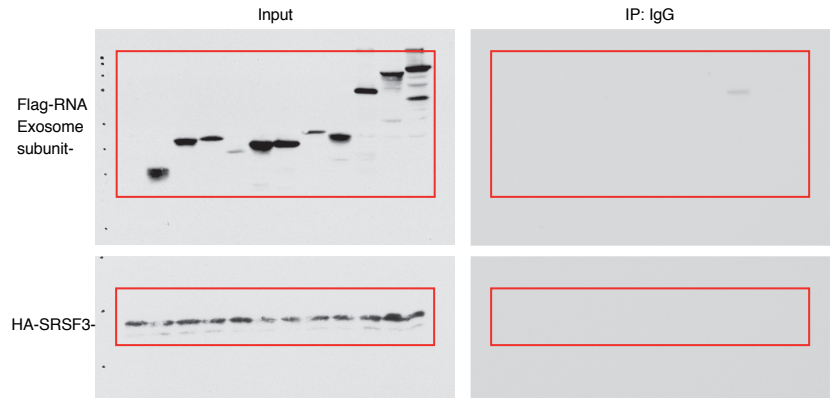

Source data for Fig. S2a

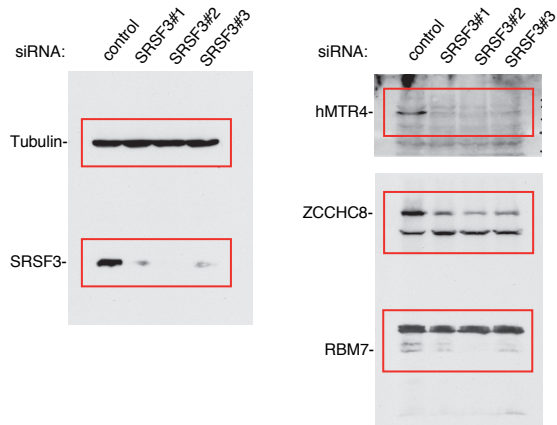

Source data for Fig. S2d

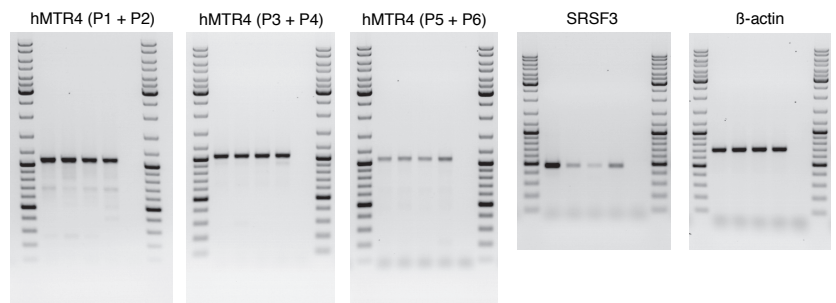

Supplementary Figure S3 (continued). Uncropped gels and blots.
